# Supplementary material for: Improving the 3D Printability and Mechanical Performance of Biorenewable Soybean Oil-Based Photocurable Resins
Source: MDPI journal article supplement (doi:10.3390/polym16070977), 2024-04-03
Supplement: s1 [file s1]

Supporting information

# Improving the 3D printability and mechanical performance of biorenewable soybean oil-based photocurable resins

Marius BODOR<sup>1</sup>, Aurora LASAGABÁSTER-LATORRE<sup>2</sup>, Goretti ARIAS-FERREIRO<sup>1,†</sup>,  
M. Sonia DOPICO-GARCÍA<sup>1</sup>, María-José ABAD<sup>1,\*</sup>

<sup>1</sup> Campus Industrial de Ferrol, Grupo de Polimeros-CITENI, Universidade da Coruña, Spain; marius.bodor@udc.es (M.B.); s.dopico@udc.es (S.D.-G.); goretti.arias@udc.es (G.A.-F.); mjabad@udc.es (M.H.-A.)

<sup>2</sup> Dpto Química Orgánica I, Facultad de Óptica y Optometría, Universidad Complutense de Madrid, Spain; aurora@quim.ucm.es

<sup>†</sup> Present address: Center for Cooperative Research in Biomaterials (CIC biomaGUNE), Basque Research and Technology Alliance (BRTA), Paseo de Miramón 194, 20014 Donostia San Sebastián, Spain

\* Correspondence: mjabad@udc.es

## S3. Results

### S3.1. Viscosity of the liquid formulations

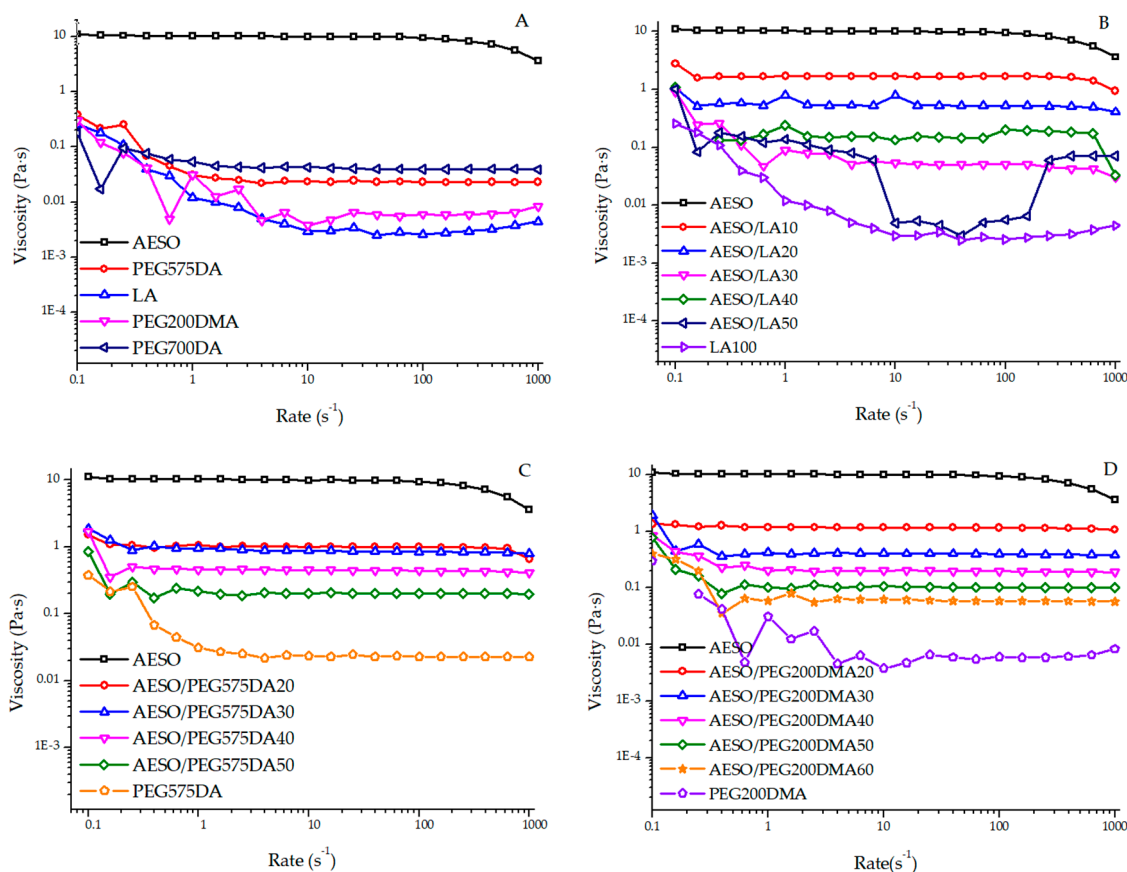

**Figure S1.** Viscosity values of (A) pure AESO and reactive diluents, (B) and mixtures of AESO/LA, (C) AESO/PEG575DA and (D) AESO/PEG200DMA as a function of shear rate at room temperature.

### S3.2. Characterization of printed formulations

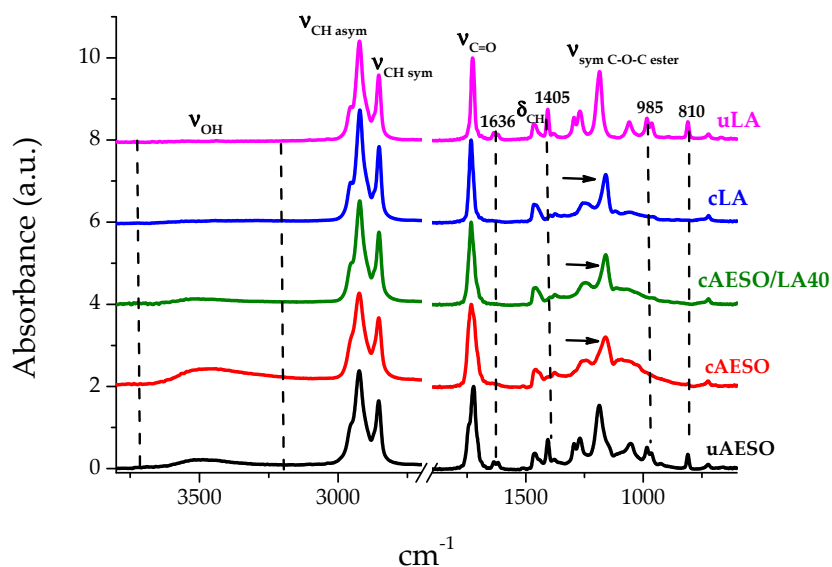

**Figure S2.** FTIR-spectra of uncured (u) and cured (c) AESO, LA and AESO/LA40. The dashed lines point at the bands assigned to the acrylate groups that disappear upon polymerisation. The arrows show the shift of the C-O-C stretching vibrations of the acrylate groups after polymerisation.

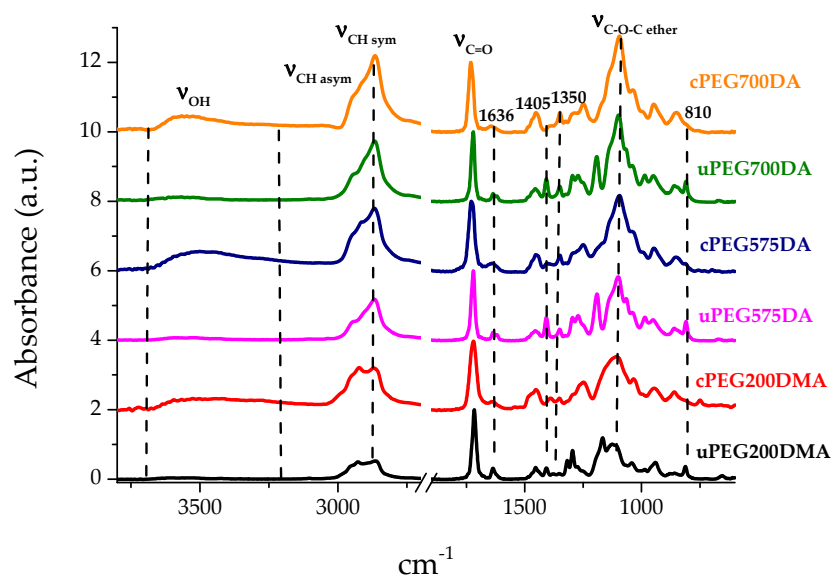

**Figure S3.** FTIR-spectra of uncured (u) and cured (c) PEG200DMA, PEG575DA and PEG700DA. The dashed lines point at the bands assigned to the acrylate groups that disappear upon polymerisation.

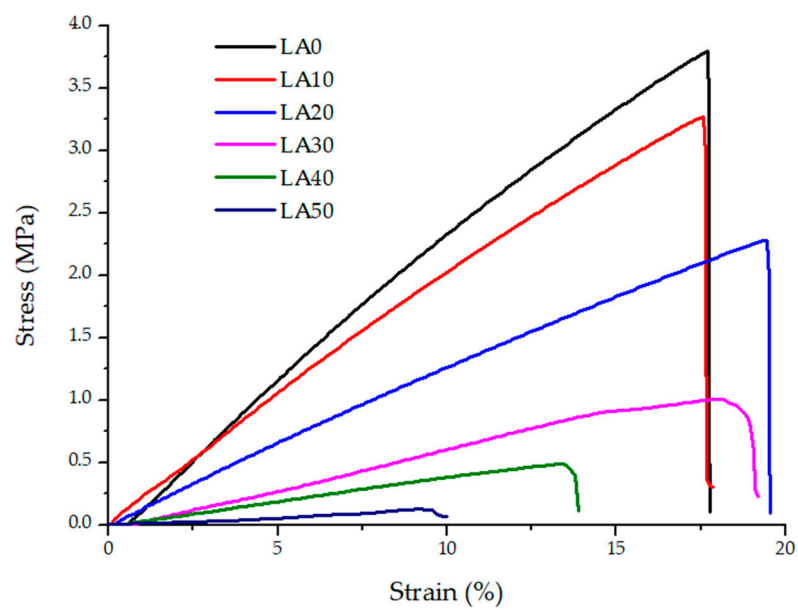

**Figure S4.** Representative strain-stress curves of AESO and AESO/LA copolymers.

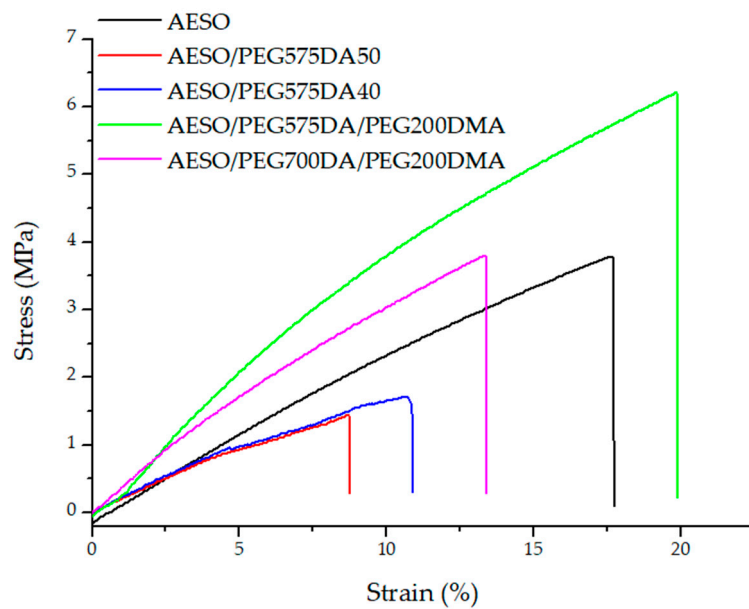

**Figure S5.** Representative strain-stress curves of AESO and AESO/PEGDA copolymers and terpolymers.

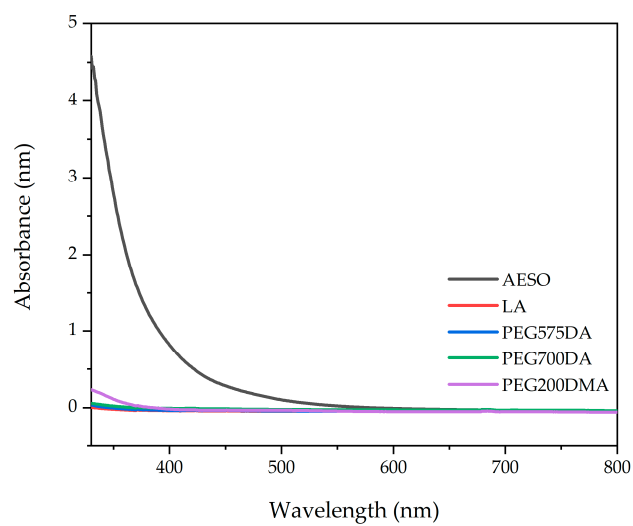

**Figure S6.** UV absorption spectra of the monomers used in formulations.
